# Supplementary material for: The Efficacy and Safety of Immune Checkpoint Inhibitors in Adrenocortical Carcinoma: A Systematic Review and Meta-Analysis
Source: MDPI journal article supplement (doi:10.3390/cancers16050900), 2024-02-23
Supplement: s1 [file s1]

## **Supplementary material**

**Figure S1.** ORR based on the used treatment.

**Figure S2.** DCR based on the used treatment.

**Figure S3.** 6-months overall survival.

**Figure S4.** 6-months progression-free survival.

**Figure S5.** Grade III/IV adverse events.

**Table S1.** Search algorithm.

**Table S2.** Quality appraisal of included studies according to MINORS assessment tool.

**Table S3.** Quality appraisal of included Case Reports studies according to JBI Critical Appraisal Checklist

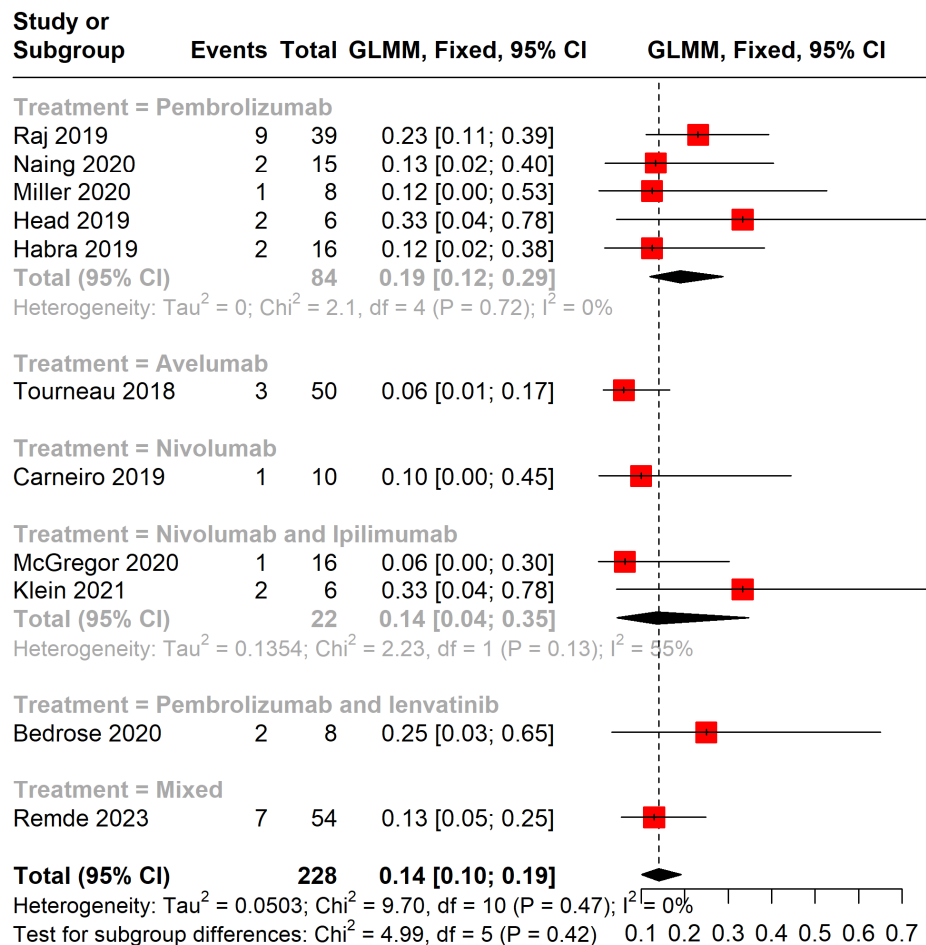

**Figure S1.** ORR based on the used treatment [16,17,21,23–25,29–32].

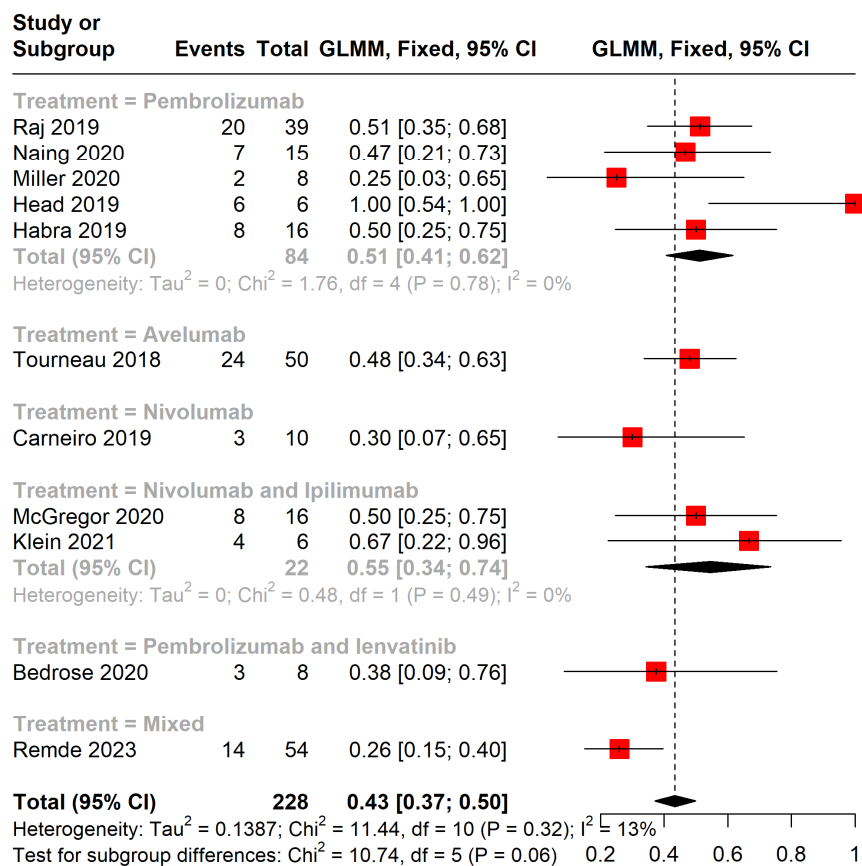

**Figure S2.** DCR based on the used treatment [16,17,21,23–25,29–32].

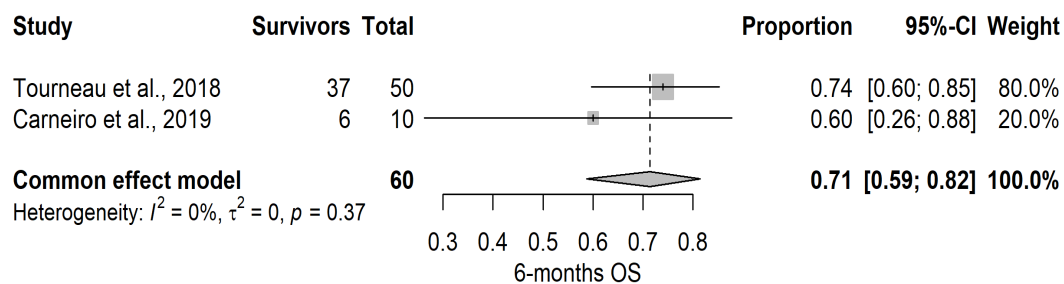

**Figure S3.** 6-months overall survival [17,23].

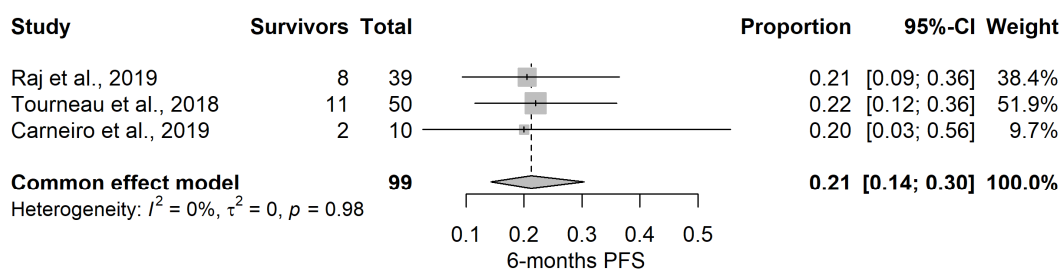

**Figure S4.** 6-months progression-free survival [16,17,23].

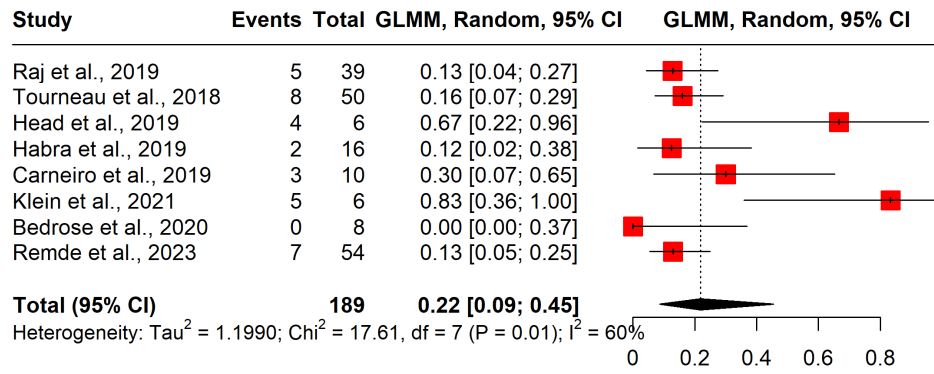

**Figure S5.** Grade III/IV adverse events [16,17,23,25,30–32].

**Table S1.** Search algorithms.

|                                                                                                                                                                                                                                                                                                                                                                                                                                                                                                                                     |
|-------------------------------------------------------------------------------------------------------------------------------------------------------------------------------------------------------------------------------------------------------------------------------------------------------------------------------------------------------------------------------------------------------------------------------------------------------------------------------------------------------------------------------------|
| PubMed                                                                                                                                                                                                                                                                                                                                                                                                                                                                                                                              |
| ((adrenocortical[Title/Abstract]) OR (acc[Title/Abstract])) OR<br>(adrenal*[Title/Abstract])) AND ((((((((((immune checkpoint<br>inhibitors[Title/Abstract]) OR (ipilimumab[Title/Abstract])) OR<br>(nivolumab[Title/Abstract])) OR (pembrolizumab[Title/Abstract])) OR<br>(avelumab[Title/Abstract])) OR (cemiplimab[Title/Abstract])) OR<br>(tremelimumab[Title/Abstract])) OR (durvalumab[Title/Abstract])) OR<br>(atezolizumab[Title/Abstract])) OR (spartalizumab[Title/Abstract])) OR<br>(immunotherapy[Title/Abstract]))     |
| Scopus                                                                                                                                                                                                                                                                                                                                                                                                                                                                                                                              |
| ( ( TITLE-ABS-KEY ( adrenocortical ) ) OR ( TITLE-ABS-KEY ( acc ) ) OR ( TITLE-ABS-KEY ( adrenal* ) ) ) AND ( ( TITLE-ABS-KEY ( "immune checkpoint inhibitors" ) ) OR ( TITLE-ABS-KEY ( "ipilimumab" ) ) OR ( TITLE-ABS-KEY ( "nivolumab" ) ) OR ( TITLE-ABS-KEY ( "pembrolizumab" ) ) OR ( TITLE-ABS-KEY ( "avelumab" ) ) OR ( TITLE-ABS-KEY ( "cemiplimab" ) ) OR ( TITLE-ABS-KEY ( "tremelimumab" ) ) OR ( TITLE-ABS-KEY ( "durvalumab" ) ) OR ( TITLE-ABS-KEY ( "atezolizumab" ) ) OR ( TITLE-ABS-KEY ( "spartalizumab" ) ) ) ) |
| CENTRAL                                                                                                                                                                                                                                                                                                                                                                                                                                                                                                                             |
| (Adrenocortical carcinoma)                                                                                                                                                                                                                                                                                                                                                                                                                                                                                                          |

**Table S2.** Quality appraisal of included studies according to MINORS assessment tool.

| Study         | A clearly stated aim | Inclusion of consecutive patients | Prospective collection of data | Endpoints appropriate to the aim of the study | Unbiased assessment of the study endpoint | Follow-up period appropriate to the aim of the study | Loss to follow up less than 5% | Prospective calculation of the study size | Overall Appraisal score |
|---------------|----------------------|-----------------------------------|--------------------------------|-----------------------------------------------|-------------------------------------------|------------------------------------------------------|--------------------------------|-------------------------------------------|-------------------------|
| Remde2023     | 2                    | 2                                 | 0                              | 2                                             | 1                                         | 2                                                    | 1                              | 0                                         | 10                      |
| Edenfield2021 | 2                    | 2                                 | 2                              | 2                                             | 2                                         | 2                                                    | 2                              | 0                                         | 14                      |
| Klein2021     | 2                    | 2                                 | 2                              | 2                                             | 1                                         | 2                                                    | 2                              | 1                                         | 14                      |
| Bedrose2020   | 2                    | 2                                 | 0                              | 2                                             | 1                                         | 2                                                    | 2                              | 1                                         | 12                      |
| McGregor2020  | 2                    | 2                                 | 2                              | 2                                             | 1                                         | 2                                                    | 1                              | 2                                         | 14                      |
| Miller2020    | 2                    | 2                                 | 0                              | 2                                             | 1                                         | 2                                                    | 2                              | 0                                         | 11                      |
| Naing2020     | 2                    | 2                                 | 2                              | 2                                             | 1                                         | 2                                                    | 1                              | 2                                         | 14                      |
| Carneiro2019  | 2                    | 2                                 | 2                              | 2                                             | 2                                         | 1                                                    | 1                              | 2                                         | 14                      |
| Geoerger2019  | 2                    | 2                                 | 2                              | 2                                             | 1                                         | 1                                                    | 2                              | 2                                         | 14                      |
| Habra2019     | 2                    | 2                                 | 2                              | 2                                             | 1                                         | 2                                                    | 1                              | 1                                         | 13                      |
| Head2019      | 2                    | 2                                 | 0                              | 2                                             | 1                                         | 2                                                    | 2                              | 0                                         | 11                      |
| Raj2019       | 2                    | 2                                 | 2                              | 2                                             | 2                                         | 2                                                    | 2                              | 2                                         | 16                      |
| Tourneau2018  | 2                    | 2                                 | 2                              | 2                                             | 1                                         | 2                                                    | 2                              | 2                                         | 15                      |
| Sakamouri2017 | 2                    | 2                                 | 2                              | 2                                             | 1                                         | 2                                                    | 2                              | 0                                         | 13                      |

**Table S3.** Quality appraisal of included Case Reports studies according to JBI Critical Appraisal Checklist.

1. Were patient's demographic characteristics clearly described?
2. Was the patient's history clearly described and presented as a timeline?
3. Was the current clinical condition of the patient on presentation clearly described?
4. Were diagnostic tests or assessment methods and the results clearly described?
5. Was the intervention(s) or treatment procedure(s) clearly described?
6. Was the post-intervention clinical condition clearly described?
7. Were adverse events (harms) or unanticipated events identified and described?
8. Does the case report provide takeaway lessons?

| Study            | Q1        | Q2  | Q3  | Q4  | Q5  | Q6  | Q7  | Q8  |
|------------------|-----------|-----|-----|-----|-----|-----|-----|-----|
| Alam2021 [36]    | YES       | YES | YES | YES | YES | YES | NO  | YES |
| Caccese2019 [35] | NOT CLEAR | YES |
| Casey2018 [34]   | NOT CLEAR | YES |
| Mota2018 [33]    | YES       | YES | YES | YES | YES | YES | YES | YES |
| Weng2023 [37]    | YES       | YES | YES | YES | YES | YES | YES | YES |
| Charles2023 [38] | YES       | YES | YES | YES | YES | YES | YES | YES |
